# Supplementary material for: Cumulative metabolic effects of low-dose benzo(a)pyrene exposure on human cells
Source: Royal Society of Chemistry journal article supplement (doi:10.1039/c5tx00378d), 2015-11-18
Supplement: c5tx00378d2.xlsx [file c5tx00378d2.xlsx]

## Sheet: Sheet1
Table S1. A total of 316 biochemicals were identified.
				Fold of change			p-values (Welch's Two-Sample t-Test)
Pathway Sort Order	Super Pathway	Sub Pathway	Biochemical Name	0.01 nM Ctrl	1 nM Ctrl	100 nM Ctrl	0.01 nM Ctrl	1 nM Ctrl	100 nM Ctrl
1	Amino Acid	Glycine, Serine and Threonine Metabolism	glycine	1.02	0.69	0.77	0.8118	0.6933	0.8646
6			betaine	1.18	1.12	1.14	0.1796	0.6424	0.2513
9			serine	1.17	0.93	1.14	0.4831	0.8712	0.5207
10			N-acetylserine	1.64	1.56	0.85	0.0662	0.0908	0.4698
14			threonine	1.13	1.02	1.2	0.5172	0.8994	0.4611
15			N-acetylthreonine	1.38	1.71	1.1	0.2001	0.0819	0.5918
24		Alanine and Aspartate Metabolism	alanine	1.25	0.73	0.94	0.5337	0.4476	0.9855
25			N-acetylalanine	1.71	1.52	1.12	0.0517	0.1213	0.5384
27			aspartate	1.18	1.07	0.84	0.2529	0.6805	0.2934
29			asparagine	1.15	0.98	0.97	0.6952	0.9918	0.933
31			N-acetylaspartate (NAA)	0.49	0.66	1.31	0.0058	0.0809	0.0878
36		Glutamate Metabolism	glutamate	1.05	1.01	1.15	0.6484	0.9403	0.3103
37			glutamine	1.09	1.04	1.12	0.6557	0.7756	0.6274
38			N-acetylglutamate	0.97	0.86	1.23	0.8517	0.4175	0.3215
40			N-acetyl-aspartyl-glutamate (NAAG)	0.85	1.03	1.86	0.27	0.9039	0.0015
41			gamma-aminobutyrate (GABA)	1.84	2.16	0.77	0.1492	0.0936	0.5921
46			glutamate, gamma-methyl ester	1.35	0.71	0.92	0.0402	0.0153	0.3299
47			pyroglutamine	2.21	1.76	0.95	0.0394	0.0573	0.8628
50		Histidine Metabolism	histidine	1.06	1.03	1	0.7656	0.8073	0.8954
60			imidazole propionate	1.5	1.08	1.18	0.0727	0.7073	0.3463
69		Lysine Metabolism	lysine	1.07	1	1.25	0.5506	0.9867	0.1759
75			2-aminoadipate	1.47	1.06	0.88	0.0109	0.7303	0.3232
84			pipecolate	0.78	0.46	0.96	0.3752	0.029	0.8893
87			5-aminovalerate	1.3	1.2	0.78	0.0019	0.1561	0.2736
91		Phenylalanine and Tyrosine Metabolism	phenylalanine	1.16	1.04	1.16	0.4618	0.7611	0.3873
102			phenylacetylglycine	1.11	0.89	1.21	0.4729	0.5051	0.2041
104			tyrosine	1.12	1.08	1.15	0.5099	0.6438	0.3662
114			3-(4-hydroxyphenyl)lactate	1.03	0.87	1.26	0.7117	0.236	0.0273
118			phenol sulfate	1.24	1.32	1.23	0.5152	0.4287	0.0605
120			p-cresol sulfate	0.92	0.88	1.1	0.7691	0.623	0.6055
174		Tryptophan Metabolism	tryptophan	1.16	1.12	1.21	0.4919	0.5038	0.3315
184			kynurenine	1.22	0.97	1.46	0.5678	0.8654	0.2531
212			C-glycosyltryptophan	1	1	1
215		Leucine, Isoleucine and Valine Metabolism	leucine	1.16	1.04	1.14	0.4129	0.7838	0.4076
218			4-methyl-2-oxopentanoate	1	1	1.41			0.1835
223			isovalerylcarnitine	1.24	1.6	0.89	0.2657	0.021	0.4177
226			beta-hydroxyisovalerate	1.23	0.99	0.87	0.5557	0.9521	0.4289
233			alpha-hydroxyisovalerate	1.02	0.72	1.66	0.9474	0.1873	0.2193
243			isoleucine	1.04	1.04	1.15	0.7361	0.8486	0.3853
245			3-methyl-2-oxovalerate	0.99	0.99	1.88	0.4226	0.4226	0.0973
246			2-methylbutyrylcarnitine (C5)	1.38	1.15	0.79	0.0707	0.3188	0.0789
251			2-hydroxy-3-methylvalerate	1	1	1
254			valine	1.06	0.97	1.14	0.7578	0.8727	0.3753
258			isobutyrylcarnitine	1.34	1.22	0.74	0.1159	0.2538	0.1404
261			alpha-hydroxyisocaproate	1.41	1.22	0.91	0.2542	0.9021	0.7857
264		Methionine, Cysteine, SAM and Taurine Metabolism	methionine	1.17	1.02	1.26	0.4025	0.8216	0.1949
265			N-acetylmethionine	1.12	1.04	0.9	0.6377	0.7451	0.7069
266			N-formylmethionine	0.98	0.83	1.04	0.7954	0.0244	0.9899
272			S-adenosylhomocysteine (SAH)	0.9	0.81	1.07	0.4926	0.2452	0.6439
273			homocysteine	0.88	1.77	0.89	0.8022	0.2108	0.7056
276			cystathionine	1.17	0.93	1.02	0.2341	0.6126	0.8378
279			2-aminobutyrate	0.95	0.84	1.02	0.8589	0.5623	0.8251
280			2-hydroxybutyrate (AHB)	1.36	1.11	1.54	0.0614	0.5294	0.0325
281			cysteine	1.27	1.59	1.07	0.9436	0.2482	0.8336
290			hypotaurine	0.88	1.3	0.9	0.7941	0.3582	0.8161
291			taurine	1.04	1.19	1.22	0.7115	0.5101	0.1962
296		Urea cycle; Arginine and Proline Metabolism	arginine	1.27	0.92	1.22	0.0417	0.5768	0.0612
298			ornithine	0.52	0.63	0.92	0.0661	0.1486	0.8324
299			proline	1	1.03	1.09	0.9413	0.7914	0.6028
300			citrulline	0.98	0.43	1.48	0.9871	0.0343	0.1186
301			argininosuccinate	0.98	0.98	0.87	0.9296	0.9425	0.6696
307			dimethylarginine (SDMA + ADMA)	1.11	1.04	1.35	0.5667	0.7564	0.0341
311			N-delta-acetylornithine	1.21	0.96	1.17	0.122	0.705	0.2922
317			trans-4-hydroxyproline	1.2	1	0.93	0.1843	0.9574	0.5989
319			pro-hydroxy-pro	1.19	0.68	1.92	0.2337	0.1318	0.0097
322		Creatine Metabolism	creatine	1.91	1.86	1.12	0.0258	0.0162	0.382
323			creatinine	1.2	1.18	1.12	0.322	0.4829	0.4635
329		Polyamine Metabolism	agmatine	0.84	0.07	1.85	0.973	0.4226	0.5526
332			putrescine	0.4	0.77	1.25	0.0869	0.5432	0.4279
334			spermidine	1	0.81	0.97	0.9021	0.3882	0.9224
335			5-methylthioadenosine (MTA)	0.82	0.67	1.15	0.1289	0.026	0.1926
338			N-acetylputrescine	0.81	0.83	1.21	0.5965	0.6055	0.5363
344		Guanidino and Acetamido Metabolism	4-guanidinobutanoate	1.5	1.37	1.02	0.0225	0.0334	0.8487
346		Glutathione Metabolism	glutathione, reduced (GSH)	1.17	1.17	0.94	0.2281	0.3931	0.6507
347			glutathione, oxidized (GSSG)	1.31	0.84	1.32	0.0898	0.3079	0.2073
351			S-lactoylglutathione	1.98	0.47	0.8	0.771	0.4226	0.8669
352			cysteinylglycine	1.45	1.66	1.29	0.2241	0.1172	0.3061
354			5-oxoproline	1.32	0.94	1.07	0.1152	0.7213	0.6217
355			ophthalmate	0.76	0.76	0.76	0.4226	0.4226	0.4226
361	Peptide	Gamma-glutamyl Amino Acid	gamma-glutamylcysteine	0.69	0.61	1.03	0.0857	0.0601	0.945
362			gamma-glutamylglutamate	1.58	1.31	1.25	0.0531	0.169	0.228
363			gamma-glutamylglutamine	1.35	1.38	1.28	0.1807	0.193	0.4136
366			gamma-glutamylisoleucine	1.27	0.95	0.87	0.1938	0.7573	0.4309
367			gamma-glutamylleucine	1.22	0.87	1.12	0.354	0.5401	0.5527
374			gamma-glutamylvaline	1	1.22	1.34	0.9403	0.3196	0.2196
432		Dipeptide	aspartylaspartate	1.13	1.01	0.79	0.8855	0.9823	0.453
464			glycylaspartate	1	1.06	0.86	0.8655	0.7227	0.6717
469			glycylglycine	1.2	1.6	1.12	0.383	0.1159	0.5389
471			glycylisoleucine	1.3	1.01	1.47	0.7307	0.8402	0.4295
472			glycylleucine	1.16	1.11	1.17	0.4919	0.5594	0.5377
482			glycylvaline	1.07	0.83	0.81	0.7776	0.4118	0.2936
506			isoleucylglycine	1.23	1.56	1.17	0.436	0.1644	0.3579
524			leucylglycine	1.76	2.55	2.39	0.0368	0.0407	0.1787
575			phenylalanylglutamate	1.37	1.48	2.56	0.7009	0.6539	0.1071
593			prolylglycine	1.14	0.67	0.93	0.3741	0.0735	0.7101
616			serylleucine	1.39	1.92	1.67	0.6567	0.0148	0.2368
731	Carbohydrate	Glycolysis, Gluconeogenesis, and Pyruvate Metabolism	glucose	0.56	0.52	1.4	0.3343	0.3298	0.9602
732			glucose-6-phosphate (G6P)	0.91	0.94	1.36	0.5383	0.7187	0.2462
733			glucose 1-phosphate	0.87	1.11	1.23	0.539	0.5846	0.3665
735			fructose-6-phosphate	0.94	1.03	1.5	0.7615	0.9717	0.3906
738			Isobar: fructose 1,6-diphosphate, glucose 1,6-diphosphate, myo-inositol 1,4 or 1,3-diphosphate	1.22	0.39	1.14	0.9054	0.1791	0.8901
740			dihydroxyacetone phosphate (DHAP)	1.33	0.21	0.95	0.7752	0.1678	0.7469
742			1,3-dihydroxyacetone	2.25	0.79	1.25	0.1344	0.6467	0.7026
744			2-phosphoglycerate	0.9	0.5	0.62	0.874	0.3567	0.4817
745			3-phosphoglycerate	1.13	0.64	0.76	0.9113	0.4909	0.7685
746			phosphoenolpyruvate (PEP)	1.27	0.79	0.58	0.797	0.7449	0.6627
747			pyruvate	1.23	0.83	0.85	0.361	0.5039	0.5376
748			lactate	1.12	0.96	1.1	0.3412	0.8008	0.4461
751			glycerate	1.84	0.97	0.96	0.1172	0.848	0.9892
754		Pentose Phosphate Pathway	6-phosphogluconate	0.9	0.65	1.07	0.7294	0.2177	0.7962
756			ribose 5-phosphate	0.81	0.29	1.03	0.3458	0.0063	0.8932
759			sedoheptulose-7-phosphate	1.71	1.39	3.04	0.6731	0.4892	0.1363
761			Isobar: pentulose 5-phosphates	1.15	0.48	1.47	0.5915	0.0309	0.5348
763		Pentose Metabolism	ribulose	1.29	0.41	1.06	0.3297	0.0089	0.9641
765			ribose	1.15	0.91	1.02	0.6958	0.553	0.8535
770			xylonate	1.5	1.5	1.24	0.1393	0.3517	0.4497
772			xylitol	1.41	1.07	1.35	0.0971	0.868	0.1204
773			arabinose	1.12	1.7	1.38	0.7062	0.093	0.3771
776			threitol	1.69	0.92	1.2	0.1626	0.9685	0.7736
778			arabitol	1.28	1.28	0.72	0.3887	0.3256	0.2063
800		Disaccharides and Oligosaccharides	lactose	0.99	0.86	1.03	0.9608	0.5307	0.7879
832		Fructose, Mannose and Galactose Metabolism	fructose	1.43	1.17	1.09	0.0553	0.3578	0.4493
835			sorbitol	1.12	1.34	1.03	0.5301	0.2086	0.918
839			mannose-6-phosphate	1.12	0.97	1.36	0.5624	0.9451	0.2874
842			mannitol	1.65	2.28	1.39	0.0393	0.012	0.2024
847			galactose	1.14	1.12	1.26	0.8694	0.8771	0.4337
848			galactitol (dulcitol)	0.98	0.6	0.6	0.9945	0.2221	0.2221
858		Nucleotide Sugar	UDP-glucose	1.04	1.02	0.82	0.7047	0.8764	0.282
862			UDP-galactose	0.95	0.8	0.72	0.825	0.2515	0.1096
863			UDP-glucuronate	1.07	1.03	1.18	0.5815	0.8714	0.2525
869			Isobar: UDP-acetylglucosamine, UDP-acetylgalactosamine	1.38	1.07	1.13	0.0815	0.6929	0.2768
883		Aminosugar Metabolism	N-acetylglucosamine 6-phosphate	1.36	1.19	0.73	0.444	0.6714	0.5447
890			N-acetylneuraminate	0.07	0.25	0.76	0.0173	0.0543	0.6222
902			erythronate	1.05	1.08	0.97	0.6684	0.592	0.8777
908	Energy	TCA Cycle	citrate	1.25	1.2	1.23	0.1278	0.4871	0.0822
909			cis-aconitate	1.14	1.28	1.54	0.1708	0.2709	0.0106
913			alpha-ketoglutarate	1.01	0.71	0.89	0.8442	0.3772	0.6516
916			succinate	1	0.89	1.06	0.9036	0.41	0.6108
917			fumarate	1.12	0.73	1	0.5298	0.0843	0.9532
918			malate	1.08	0.82	1.04	0.4892	0.2181	0.6899
928		Oxidative Phosphorylation	pyrophosphate (PPi)	0.98	1.05	0.74	0.9914	0.8245	0.2093
929			phosphate	1.01	1.07	1.11	0.9262	0.7149	0.422
931	Lipid	Medium Chain Fatty Acid	caproate (6:0)	0.54	1.04	1.16	0.1844	0.939	0.8058
933			caprylate (8:0)	1.07	0.67	1	0.6385	0.2582	0.9609
935			caprate (10:0)	0.97	1.21	1.1	0.8823	0.4092	0.5722
941		Long Chain Fatty Acid	myristate (14:0)	1.09	0.96	1.34	0.5964	0.7391	0.057
942			myristoleate (14:1n5)	1.11	0.83	1.28	0.5677	0.2883	0.1599
945			palmitoleate (16:1n7)	1.17	0.91	1.46	0.5093	0.9323	0.2837
948			10-heptadecenoate (17:1n7)	0.94	0.84	1.38	0.8933	0.8653	0.3198
951			oleate (18:1n9)	1.18	1.04	1.33	0.3145	0.866	0.0454
953			cis-vaccenate (18:1n7)	1.12	0.92	1.23	0.6102	0.5519	0.1296
958			10-nonadecenoate (19:1n9)	0.91	0.62	1.23	0.9622	0.3277	0.4377
960			arachidate (20:0)	1.23	0.9	1.26	0.2053	0.6305	0.202
963			eicosenoate (20:1n9 or 11)	0.97	0.72	1.05	0.8999	0.4252	0.7058
967			erucate (22:1n9)	0.93	0.75	0.97	0.9909	0.4793	0.9354
970			nervonate (24:1n9)	0.99	1.35	1.53	0.9351	0.2761	0.0593
976		Polyunsaturated Fatty Acid (n3 and n6)	eicosapentaenoate (EPA; 20:5n3)	1.39	1.15	2.07	0.2006	0.4787	0.0491
977			docosapentaenoate (n3 DPA; 22:5n3)	0.98	0.78	1.7	0.8718	0.6512	0.1732
978			docosahexaenoate (DHA; 22:6n3)	1.01	0.7	1.57	0.7363	0.6138	0.2531
979			docosatrienoate (22:3n3)	0.79	0.73	1.71	0.6891	0.5556	0.176
982			linoleate (18:2n6)	1.12	0.83	1.43	0.5719	0.775	0.2841
984			linolenate [alpha or gamma; (18:3n3 or 6)]	1.34	1.32	1.47	0.27	0.2389	0.1455
986			dihomo-linolenate (20:3n3 or n6)	1.12	0.84	1.76	0.5758	0.767	0.1585
987			arachidonate (20:4n6)	1.32	1.08	2.16	0.317	0.6696	0.067
990			docosadienoate (22:2n6)	1.55	1	1.03	0.1727	0.8894	0.7846
991			dihomo-linoleate (20:2n6)	1.8	1.02	1.3	0.1339	0.8797	0.3817
993			mead acid (20:3n9)	1	1	1
1047		Fatty Acid, Dicarboxylate	2-hydroxyglutarate	1.13	0.95	0.85	0.2521	0.7202	0.1005
1093		Fatty Acid, Amide	palmitic amide	1.95	0.77	1.47	0.4417	0.6583	0.3069
1096			stearamide	1.89	0.95	1.2	0.3093	0.8643	0.4025
1116		Fatty Acid Metabolism	acetyl CoA	1	1	1.2			0.4226
1127		Fatty Acid Metabolism (also BCAA Metabolism)	butyrylcarnitine	0.87	1.1	0.64	0.6489	0.5903	0.1594
1130			propionylcarnitine	2.15	1.71	0.81	0.0214	0.0632	0.4686
1144		Fatty Acid Metabolism(Acyl Carnitine)	acetylcarnitine	1.51	1.22	1.3	0.0054	0.0868	0.09
1146			valerylcarnitine	1.25	1.09	0.78	0.1758	0.6416	0.27
1147			hexanoylcarnitine	1.34	1.45	1.01	0.0663	0.0368	0.888
1154			myristoylcarnitine	0.81	0.79	0.9	0.3033	0.249	0.6288
1156			palmitoylcarnitine	0.79	0.86	1.3	0.2986	0.5559	0.3832
1157			stearoylcarnitine	0.78	0.99	1.18	0.4595	0.9049	0.6186
1158			oleoylcarnitine	0.7	0.48	0.96	0.6861	0.2936	0.8701
1159		Carnitine Metabolism	deoxycarnitine	1.25	1.09	1.19	0.1488	0.6096	0.2979
1160			carnitine	1.56	1.45	1.08	0.0397	0.0796	0.5423
1161			3-dehydrocarnitine	1.46	1.4	0.97	0.0665	0.0978	0.8726
1166		Neurotransmitter	acetylcholine	1	1	1
1167		Fatty Acid, Monohydroxy	4-hydroxybutyrate (GHB)	0.85	0.56	1.05	0.548	0.1189	0.561
1177			3-hydroxydecanoate	0.93	0.91	1.23	0.554	0.5823	0.0999
1196			13-HODE + 9-HODE	1.17	1.07	1.41	0.4153	0.6999	0.1439
1289		Endocannabinoid	N-oleoyltaurine	1.07	1.04	1.96	0.7554	0.8088	0.0892
1291			N-palmitoyltaurine	0.86	0.94	1.41	0.7046	0.9233	0.2415
1293		Inositol Metabolism	myo-inositol	1.03	1.21	0.89	0.8796	0.5074	0.8315
1296			scyllo-inositol	1.07	1.45	0.8	0.9181	0.272	0.7032
1301			inositol 1-phosphate (I1P)	1.3	1.24	1.17	0.1561	0.2475	0.3223
1320		Phospholipid Metabolism	choline	0.72	1.69	1.39	0.2516	0.1028	0.1831
1321			choline phosphate	0.17	2.2	0.58	0.0106	0.0795	0.2302
1322			cytidine 5'-diphosphocholine	0.57	1.2	0.85	0.0972	0.3985	0.5987
1323			glycerophosphorylcholine (GPC)	1.38	1.75	1.96	0.0803	0.0359	0.0243
1326			ethanolamine	1.13	0.76	1.01	0.5721	0.2343	0.8667
1327			phosphoethanolamine	1.46	1.1	1.14	0.0542	0.483	0.108
1329			glycerophosphoethanolamine	2.19	2.64	1.6	0.0243	0.0127	0.0928
1331		Lysolipid	1-myristoylglycerophosphocholine (14:0)	1.1	1	1.07	0.9666	0.9857	0.7316
1332			2-myristoylglycerophosphocholine	0.95	0.71	0.81	0.6686	0.0376	0.0628
1336			1-palmitoylglycerophosphocholine (16:0)	2.33	1.24	1.11	0.3502	0.0089	0.0718
1337			2-palmitoylglycerophosphocholine	1.46	0.81	1.01	0.5164	0.2649	0.8461
1338			1-palmitoleoylglycerophosphocholine (16:1)	1.27	0.85	1.23	0.6379	0.4688	0.2914
1339			2-palmitoleoylglycerophosphocholine	1.73	0.96	1.17	0.3428	0.7945	0.2452
1340			1-margaroylglycerophosphocholine (17:0)	1.22	0.75	1.2	0.7898	0.4226	0.6153
1342			1-stearoylglycerophosphocholine (18:0)	1.93	1.4	1.53	0.2046	0.1105	0.0564
1343			2-stearoylglycerophosphocholine	1.33	0.49	1.57	0.4113	0.0576	0.1256
1344			1-oleoylglycerophosphocholine (18:1)	2.25	1.13	1.39	0.3163	0.2378	0.0208
1346			2-oleoylglycerophosphocholine	2.03	1.01	1.08	0.2547	0.8236	0.4775
1347			1-linoleoylglycerophosphocholine (18:2n6)	2.56	1.04	2.29	0.1358	0.8984	0.0068
1348			2-linoleoylglycerophosphocholine	1.69	0.9	1.22	0.5141	0.7668	0.3835
1355			1-eicosenoylglycerophosphocholine (20:1n9)	1.27	1.11	1.24	0.636	0.531	0.408
1357			2-eicosatrienoylglycerophosphocholine	1.3	0.72	1.38	0.631	0.3209	0.2009
1359			2-arachidonoylglycerophosphocholine	1.24	0.66	1.39	0.93	0.0444	0.0885
1363			2-docosapentaenoylglycerophosphocholine (22:5n3)	1.26	0.52	1.1	0.8821	0.1893	0.723
1365			2-docosahexaenoylglycerophosphocholine	1.22	0.82	1.07	0.8789	0.2612	0.6124
1368			1-palmitoylplasmenylethanolamine	1.77	0.9	1.78	0.1715	0.6015	0.0428
1369			1-stearoylplasmenylethanolamine	1.89	2.49	2.67	0.4438	0.0618	0.1936
1370			1-oleoylplasmenylethanolamine	2.57	1.17	2.3	0.0419	0.7135	0.0338
1373			1-palmitoylglycerophosphoethanolamine	1.26	1	1	0.4318	0.4226	0.4226
1374			2-palmitoylglycerophosphoethanolamine	1.85	0.96	1.29	0.1625	0.7582	0.0761
1376			1-stearoylglycerophosphoethanolamine	1.88	1.13	1.33	0.3442	0.4976	0.0955
1378			1-oleoylglycerophosphoethanolamine	1.44	0.71	1.27	0.3734	0.2694	0.308
1379			2-oleoylglycerophosphoethanolamine	1.34	0.76	1.12	0.5772	0.1066	0.7799
1381			2-palmitoleoylglycerophosphoethanolamine	2.41	1.47	1.32	0.0877	0.0623	0.1253
1383			2-linoleoylglycerophosphoethanolamine	2.58	1.68	1.69	0.0512	0.1238	0.1286
1387			2-arachidonoylglycerophosphoethanolamine	1.46	1.01	1.55	0.3019	0.9086	0.0499
1388			2-docosapentaenoylglycerophosphoethanolamine	1.74	0.86	1.3	0.2371	0.6665	0.2945
1389			2-docosahexaenoylglycerophosphoethanolamine	1.45	1.06	1.42	0.5166	0.6061	0.0481
1392			2-eicosapentaenoylglycerophosphoethanolamine	1.57	1.2	1.18	0.3542	0.1587	0.9582
1399			1-stearoylglycerophosphoinositol	0.71	0.88	1.18	0.6234	0.9047	0.57
1402			2-oleoylglycerophosphoinositol	1.02	1.33	2	0.9595	0.7485	0.1852
1409			1-stearoylglycerophosphoserine	1.12	0.97	1.49	0.7188	0.917	0.1475
1423			1-stearoylglycerophosphoglycerol	1	1	1
1424			2-stearoylglycerophosphoglycerol	0.81	1.01	0.77	0.5198	0.9651	0.4226
1425			1-oleoylglycerophosphoglycerol	1.49	1.95	1.17	0.2804	0.1391	0.5382
1426		Glycerolipid Metabolism	glycerol	1.06	0.71	1.02	0.6643	0.3443	0.7912
1427			glycerol 3-phosphate (G3P)	1.19	1.07	1.45	0.1248	0.6132	0.0176
1437		Monoacylglycerol	2-palmitoylglycerol (2-monopalmitin)	0.88	0.57	0.72	0.5547	0.056	0.3004
1441			1-oleoylglycerol (1-monoolein)	1.12	1.28	1.15	0.8145	0.1982	0.6077
1460		Sphingolipid Metabolism	sphinganine	0.82	0.52	1.32	0.7212	0.2462	0.4095
1463			palmitoyl sphingomyelin	1.11	1.04	1.14	0.4062	0.7193	0.3034
1464			stearoyl sphingomyelin	1.15	1.12	1.29	0.2248	0.3679	0.0927
1469			sphingosine	1.08	0.88	1.19	0.7816	0.9187	0.503
1477			N-palmitoyl-D-erythro-sphingosine	0.74	0.62	1.13	0.137	0.0456	0.6177
1490		Sterol	lathosterol	0.95	0.82	0.84	0.7268	0.4022	0.4587
1491			desmosterol	1	1	1
1492			cholesterol	1.08	0.98	1.14	0.5195	0.892	0.3299
1496			7-beta-hydroxycholesterol	1.13	0.92	1.47	0.2664	0.5098	0.0183
1503			7-ketocholesterol	1.53	1.67	1.28	0.315	0.2475	0.5111
1505			cholestanol	1.25	1.07	1.2	0.2335	0.6613	0.2701
1513			beta-sitosterol	1	1	1
1515			campesterol	1	1	1
1560		Steroid	cortisol	1	1	1
2041	Nucleotide	Purine Metabolism, (Hypo)Xanthine/Inosine containing	inosine 5'-monophosphate (IMP)	0.97	0.94	1.23	0.8661	0.729	0.2171
2042			inosine	1	1.22	2.67	0.8299	0.7626	0.2549
2043			hypoxanthine	0.88	0.99	1.09	0.7566	0.8723	0.6136
2044			xanthine	0.74	0.8	1.22	0.2746	0.3808	0.3997
2051			urate	1.31	1.09	1.4	0.2938	0.8511	0.3329
2052			allantoin	1.16	0.88	0.91	0.5503	0.9685	0.9664
2055		Purine Metabolism, Adenine containing	adenosine 5'-triphosphate (ATP)	1.5	0.98	1.1	0.0556	0.8663	0.9782
2056			adenosine 5'-diphosphate (ADP)	1.25	1.18	1.53	0.3967	0.4464	0.1295
2057			adenosine 5'-monophosphate (AMP)	1.23	1.3	2	0.5029	0.478	0.1708
2063			adenylosuccinate	0.67	1.36	1.73	0.2885	0.3894	0.2799
2064			adenosine	0.91	0.82	2.33	0.9544	0.8755	0.2486
2065			adenine	0.68	0.55	1.06	0.0976	0.0233	0.7021
2070			N1-methyladenosine	1.21	1.3	1.96	0.2084	0.1835	0.0012
2090		Purine Metabolism, Guanine containing	guanosine 5'- monophosphate (5'-GMP)	1.04	1.14	2.61	0.8604	0.7466	0.2176
2095			guanosine	1	1	1
2096			guanine	1	1	1
2113		Pyrimidine Metabolism, Orotate containing	N-carbamoylaspartate	0.43	0.57	1.56	0.0554	0.1286	0.1834
2115			orotate	0.45	0.7	1.2	0.0502	0.03	0.5819
2120		Pyrimidine Metabolism, Uracil containing	uridine 5'-triphosphate (UTP)	1.08	0.98	0.7	0.6185	0.9358	0.2791
2121			uridine 5'-diphosphate (UDP)	1.12	1.34	1.14	0.4447	0.1582	0.4231
2123			uridine monophosphate (5' or 3')	1.06	1.28	1.81	0.732	0.4439	0.2486
2127			uridine	1.24	1.44	2.5	0.4317	0.3174	0.0869
2128			uracil	0.54	0.61	0.99	0.0563	0.0567	0.9831
2129			pseudouridine	0.99	0.5	1.3	0.8828	0.0424	0.2537
2137			5,6-dihydrouracil	1.56	1.38	1.25	0.1526	0.2045	0.32
2144			beta-alanine	1.03	1.86	0.8	0.7955	0.2223	0.9126
2149		Pyrimidine Metabolism, Cytidine containing	cytidine 5'-monophosphate (5'-CMP)	1.33	1.72	1.56	0.0985	0.0215	0.6044
2152			cytidine	2.04	1.84	1	0.1932	0.4226
2169		Pyrimidine Metabolism, Thymine containing	thymine	0.14	0.24	0.66	0.0326	0.0161	0.1044
2172			3-aminoisobutyrate	2.04	1.24	0.72	0.1777	0.4972	0.6531
2173		Purine and Pyrimidine Metabolism	methylphosphate	1.45	1.03	1.17	0.0213	0.7461	0.1391
2178	Cofactors and Vitamins	Nicotinate and Nicotinamide Metabolism	nicotinamide	0.94	0.69	1.35	0.699	0.1798	0.149
2180			nicotinamide ribonucleotide (NMN)	0.74	0.63	1.04	0.3792	0.2156	0.9724
2182			nicotinamide adenine dinucleotide (NAD+)	0.91	0.96	1.08	0.3866	0.7483	0.3953
2183			nicotinamide adenine dinucleotide reduced (NADH)	1.11	0.73	1.07	0.3052	0.0716	0.7115
2184			nicotinamide adenine dinucleotide phosphate (NADP+)	1.24	1.04	1.1	0.1186	0.7756	0.4492
2187			nicotinate adenine dinucleotide (NAAD+)	0.8	0.8	0.98	0.1016	0.1016	0.8397
2190			1-methylnicotinamide	1.02	1.18	1.16	0.9959	0.4128	0.5249
2198			adenosine 5'diphosphoribose	1.1	0.76	1.25	0.5019	0.2421	0.2302
2200		Riboflavin Metabolism	riboflavin (Vitamin B2)	0.91	1.05	0.92	0.7664	0.7002	0.8308
2201			flavin adenine dinucleotide (FAD)	1.32	1.14	1.19	0.0717	0.4313	0.1887
2203		Pantothenate and CoA Metabolism	pantothenate	1.47	1.51	1.22	0.0447	0.0282	0.1522
2207			coenzyme A	1.48	1.26	1.37	0.0223	0.2026	0.0064
2209		Ascorbate and Aldarate Metabolism	gulono-1,4-lactone	1.2	1.25	1.16	0.2235	0.1367	0.332
2216		Tocopherol Metabolism	alpha-tocopherol	1.71	1	1	0.2024
2232		Folate Metabolism	5-methyltetrahydrofolate (5MeTHF)	1.87	1.69	1.38	0.1681	0.1511	0.3005
2258		Thiamine Metabolism	thiamin (Vitamin B1)	1.21	0.84	1.32	0.2738	0.3805	0.1154
2268		Vitamin B6 Metabolism	pyridoxine (Vitamin B6)	1.26	1.04	1.41	0.0559	0.7858	0.0132
2269			pyridoxamine	0.94	1.39	1.2	0.9853	0.3933	0.5851
2275	Xenobiotics	Benzoate Metabolism	hippurate	1.07	0.91	0.97	0.7075	0.6359	0.7922
2402		Food Component/Plant	genistein	1	1	1
2469			gluconate	1.79	0.79	0.92	0.0144	0.1609	0.6349
2490			biochanin A	1	1	1
2537			erythritol	1.16	1.12	1.12	0.3162	0.4747	0.3122
2558			homostachydrine	1.27	0.75	1.04	0.2439	0.0697	0.7621
2640			stachydrine	1	1	1
2846		Drug	penicillin G	0.93	0.72	0.98	0.8008	0.2151	0.9088
2999		Chemical	dimethyl sulfoxide (DMSO)	0.9	0.94	1.04	0.4226	0.6542	0.7632
3004			glycerol 2-phosphate	1.2	1.35	1.58	0.2165	0.1523	0.0257
3008			HEPES	1.13	0.98	1.25	0.2788	0.8544	0.0674
3025			phenol red	1.08	0.86	1.19	0.6048	0.4273	0.2264
