# Supplementary material for: Cumulative metabolic effects of low-dose benzo(a)pyrene exposure on human cells
Source: Royal Society of Chemistry journal article supplement (doi:10.1039/c5tx00378d), 2015-11-18
Supplement: c5tx00378d3.xlsx [file c5tx00378d3.xlsx]

## Sheet: Sheet1
Table S2. The biochemicals altered significantly by BaP.
Biochemical Name	KEGG	0.01 nM Ctrl	1 nM Ctrl	100 nM Ctrl
N-acetylserine		1.64	1.56	0.85		0.55	Green: indicates significant difference (p≤0.05) between the groups shown, metabolite ratio of < 1.00
N-acetylthreonine	C01118	1.38	1.71	1.1		0.76	Light Green: narrowly missed statistical cutoff for significance 0.05<p<0.10, metabolite ratio of < 1.00
N-acetylalanine	C02847	1.71	1.52	1.12		1.71	Red: indicates significant difference (p≤0.05) between the groups shown; metabolite ratio of ≥ 1.00
N-acetylaspartate (NAA)	C01042	0.49	0.66	1.31		1.32	Light Red: narrowly missed statistical cutoff for significance 0.05<p<0.10, metabolite ratio of ≥ 1.00
N-acetyl-aspartyl-glutamate (NAAG)	C12270	0.85	1.03	1.86		1.2	Non-colored text and cell: mean values are not significantly different for that comparison
gamma-aminobutyrate (GABA)	C00334	1.84	2.16	0.77
glutamate, gamma-methyl ester		1.35	0.71	0.92
pyroglutamine		2.21	1.76	0.95
imidazole propionate		1.5	1.08	1.18
2-aminoadipate	C00956	1.47	1.06	0.88
pipecolate	C00408	0.78	0.46	0.96
5-aminovalerate	C00431	1.3	1.2	0.78
3-(4-hydroxyphenyl)lactate	C03672	1.03	0.87	1.26
phenol sulfate	C02180	1.24	1.32	1.23
phenol sulfate		1.24	1.6	0.89
3-methyl-2-oxovalerate	C00671	0.99	0.99	1.88
2-methylbutyrylcarnitine (C5)		1.38	1.15	0.79
N-formylmethionine	C03145	0.98	0.83	1.04
2-hydroxybutyrate (AHB)	C05984	1.36	1.11	1.54
arginine	C00062	1.27	0.92	1.22
ornithine	C00077	0.52	0.63	0.92
citrulline	C00327	0.98	0.43	1.48
dimethylarginine (SDMA + ADMA)	C03626	1.11	1.04	1.35
pro-hydroxy-pro		1.19	0.68	1.92
creatine	C00300	1.91	1.86	1.12
putrescine	C00134	0.4	0.77	1.25
5-methylthioadenosine (MTA)	C00170	0.82	0.67	1.15
4-guanidinobutanoate	C01035	1.5	1.37	1.02
glutathione, oxidized (GSSG)	C00127	1.31	0.84	1.32
gamma-glutamylcysteine	C00669	0.69	0.61	1.03
gamma-glutamylglutamate	C05282	1.58	1.31	1.25
leucylglycine		1.76	2.55	2.39
prolylglycine		1.14	0.67	0.93
serylleucine		1.39	1.92	1.67
ribose 5-phosphate	C00117	0.81	0.29	1.03
Isobar: pentulose 5-phosphates	C00199	1.15	0.48	1.47
ribulose	C00309	1.29	0.41	1.06
xylitol	C00379	1.41	1.07	1.35
arabinose	C00216	1.12	1.7	1.38
fructose	C00095	1.43	1.17	1.09
mannitol	C00392	1.65	2.28	1.39
Isobar: UDP-acetylglucosamine, UDP-acetylgalactosamine		1.38	1.07	1.13
N-acetylneuraminate	C00270	0.07	0.25	0.76
citrate	C00158	1.25	1.2	1.23
cis-aconitate	C00417	1.14	1.28	1.54
fumarate	C00122	1.12	0.73	1
myristate (14:0)	C06424	1.09	0.96	1.34
oleate (18:1n9)	C00712	1.18	1.04	1.33
nervonate (24:1n9)	C08323	0.99	1.35	1.53
eicosapentaenoate (EPA; 20:5n3)	C06428	1.39	1.15	2.07
arachidonate (20:4n6)	C00219	1.32	1.08	2.16
propionylcarnitine	C03017	2.15	1.71	0.81
acetylcarnitine	C02571	1.51	1.22	1.3
hexanoylcarnitine		1.34	1.45	1.01
carnitine	C00318	1.56	1.45	1.08
3-dehydrocarnitine	C02636	1.46	1.4	0.97
3-hydroxydecanoate		0.93	0.91	1.23
N-oleoyltaurine		1.07	1.04	1.96
choline phosphate	C00588	0.17	2.2	0.58
cytidine 5'-diphosphocholine	C00307	0.57	1.2	0.85
glycerophosphorylcholine (GPC)	C00670	1.38	1.75	1.96
phosphoethanolamine	C00346	1.46	1.1	1.14
glycerophosphoethanolamine	C01233	2.19	2.64	1.6
2-myristoylglycerophosphocholine		0.95	0.71	0.81
1-palmitoylglycerophosphocholine (16:0)		2.33	1.24	1.11
1-stearoylglycerophosphocholine (18:0)		1.93	1.4	1.53
2-stearoylglycerophosphocholine		1.33	0.49	1.57
1-oleoylglycerophosphocholine (18:1)		2.25	1.13	1.39
1-linoleoylglycerophosphocholine (18:2n6)	C04100	2.56	1.04	2.29
2-arachidonoylglycerophosphocholine		1.24	0.66	1.39
1-palmitoylplasmenylethanolamine		1.77	0.9	1.78
1-stearoylplasmenylethanolamine		1.89	2.49	2.67
1-oleoylplasmenylethanolamine		2.57	1.17	2.3
2-palmitoylglycerophosphoethanolamine		1.85	0.96	1.29
1-stearoylglycerophosphoethanolamine		1.88	1.13	1.33
2-palmitoleoylglycerophosphoethanolamine		2.41	1.47	1.32
2-linoleoylglycerophosphoethanolamine		2.58	1.68	1.69
2-arachidonoylglycerophosphoethanolamine		1.46	1.01	1.55
2-docosahexaenoylglycerophosphoethanolamine		1.45	1.06	1.42
glycerol 3-phosphate (G3P)	C00093	1.19	1.07	1.45
2-palmitoylglycerol (2-monopalmitin)		0.88	0.57	0.72
stearoyl sphingomyelin	C00550	1.15	1.12	1.29
N-palmitoyl-D-erythro-sphingosine		0.74	0.62	1.13
7-beta-hydroxycholesterol		1.13	0.92	1.47
adenosine 5'-triphosphate (ATP)	C00002	1.5	0.98	1.1
adenine	C00147	0.68	0.55	1.06
N1-methyladenosine	C02494	1.21	1.3	1.96
N-carbamoylaspartate	C00438	0.43	0.57	1.56
orotate	C00295	0.45	0.7	1.2
uridine	C00299	1.24	1.44	2.5
uracil	C00106	0.54	0.61	0.99
pseudouridine	C02067	0.99	0.5	1.3
cytidine 5'-monophosphate (5'-CMP)	C00055	1.33	1.72	1.56
thymine	C00178	0.14	0.24	0.66
methylphosphate		1.45	1.03	1.17
nicotinamide adenine dinucleotide reduced (NADH)	C00004	1.11	0.73	1.07
flavin adenine dinucleotide (FAD)	C00016	1.32	1.14	1.19
pantothenate	C00864	1.47	1.51	1.22
coenzyme A	C00010	1.48	1.26	1.37
pyridoxine (Vitamin B6)	C00314	1.26	1.04	1.41
gluconate	C00257	1.79	0.79	0.92
homostachydrine	C08283	1.27	0.75	1.04
glycerol 2-phosphate	C02979	1.2	1.35	1.58
HEPES		1.13	0.98	1.25
