# Supplementary material for: Cumulative metabolic effects of low-dose benzo(a)pyrene exposure on human cells
Source: Royal Society of Chemistry journal article supplement (doi:10.1039/c5tx00378d), 2015-11-18
Supplement: c5tx00378d4.xlsx [file c5tx00378d4.xlsx]

## Sheet: Sheet1
Table S3. The genes in the network which were potentially altered by B[a]P.
Gene Symbol	Entrez Gene	Gene Discription
AADAT	51166	aminoadipate aminotransferase
AASDHPPT	60496	aminoadipate-semialdehyde dehydrogenase-phosphopantetheinyl transferase
ABAT	18	4-aminobutyrate aminotransferase
ABP1	26	amiloride binding protein 1 (amine oxidase (copper-containing))
ACAA1	30	acetyl-Coenzyme A acyltransferase 1
ACAA2	10449	acetyl-Coenzyme A acyltransferase 2
ACAT1	38	acetyl-Coenzyme A acetyltransferase 1
ACAT2	39	acetyl-Coenzyme A acetyltransferase 2
ACLY	47	ATP citrate lyase
ACO1	48	aconitase 1, soluble
ACO2	50	aconitase 2, mitochondrial
ACSL1	2180	acyl-CoA synthetase long-chain family member 1
ACSL3	2181	acyl-CoA synthetase long-chain family member 3
ACSL4	2182	acyl-CoA synthetase long-chain family member 4
ACSL5	51703	acyl-CoA synthetase long-chain family member 5
ACSL6	23305	acyl-CoA synthetase long-chain family member 6
ACY1	95	aminoacylase 1
ACY3	91703	aspartoacylase (aminocyclase) 3
ADC	113451	arginine decarboxylase
ADCY1	107	adenylate cyclase 1 (brain)
ADCY2	108	adenylate cyclase 2 (brain)
ADCY3	109	adenylate cyclase 3
ADCY4	196883	adenylate cyclase 4
ADCY5	111	adenylate cyclase 5
ADCY6	112	adenylate cyclase 6
ADCY7	113	adenylate cyclase 7
ADCY8	114	adenylate cyclase 8 (brain)
ADCY9	115	adenylate cyclase 9
ADPRH	141	ADP-ribosylarginine hydrolase
ADSL	158	adenylosuccinate lyase
AGMAT	79814	agmatine ureohydrolase (agmatinase)
AICDA	57379	activation-induced cytidine deaminase
AKR1B1	231	aldo-keto reductase family 1, member B1 (aldose reductase)
ALDH1A3	220	aldehyde dehydrogenase 1 family, member A3
ALDH1B1	219	aldehyde dehydrogenase 1 family, member B1
ALDH2	217	aldehyde dehydrogenase 2 family (mitochondrial)
ALDH3A1	218	aldehyde dehydrogenase 3 family, memberA1
ALDH3A2	224	aldehyde dehydrogenase 3 family, member A2
ALDH7A1	501	aldehyde dehydrogenase 7 family, member A1
ALDH9A1	223	aldehyde dehydrogenase 9 family, member A1
ALG12	79087	asparagine-linked glycosylation 12, alpha-1,6-mannosyltransferase homolog (S. cerevisiae)
ALG2	85365	asparagine-linked glycosylation 2, alpha-1,3-mannosyltransferase homolog (S. cerevisiae)
ALG3	10195	asparagine-linked glycosylation 3, alpha-1,3- mannosyltransferase homolog (S. cerevisiae)
ALOX12	239	arachidonate 12-lipoxygenase
ALOX15	246	arachidonate 15-lipoxygenase
ALOX15B	247	arachidonate 15-lipoxygenase, type B
ALOX5	240	arachidonate 5-lipoxygenase
AOC2	314	amine oxidase, copper containing 2 (retina-specific)
AOC3	8639	amine oxidase, copper containing 3 (vascular adhesion protein 1)
APOBEC4	403314	apolipoprotein B mRNA editing enzyme, catalytic polypeptide-like 4 (putative)
APRT	353	adenine phosphoribosyltransferase
ARD1A	8260	ARD1 homolog A, N-acetyltransferase (S. cerevisiae)
ARG1	383	arginase, liver
ARG2	384	arginase, type II
ART1	417	ADP-ribosyltransferase 1
ART3	419	ADP-ribosyltransferase 3
ART4	420	ADP-ribosyltransferase 4 (Dombrock blood group)
ART5	116969	ADP-ribosyltransferase 5
ASL	435	argininosuccinate lyase
ASPA	443	aspartoacylase (Canavan disease)
ASS1	445	argininosuccinate synthetase 1
ATP10A	57194	ATPase, class V, type 10A
ATP10B	23120	ATPase, class V, type 10B
ATP10D	57205	ATPase, class V, type 10D
ATP11A	23250	ATPase, class VI, type 11A
ATP11B	23200	ATPase, class VI, type 11B
ATP11C	286410	ATPase, class VI, type 11C
ATP12A	479	ATPase, H+/K+ transporting, nongastric, alpha polypeptide
ATP1A1	476	ATPase, Na+/K+ transporting, alpha 1 polypeptide
ATP1A2	477	ATPase, Na+/K+ transporting, alpha 2 (+) polypeptide
ATP1A3	478	ATPase, Na+/K+ transporting, alpha 3 polypeptide
ATP1A4	480	ATPase, Na+/K+ transporting, alpha 4 polypeptide
ATP1B1	481	ATPase, Na+/K+ transporting, beta 1 polypeptide
ATP1B2	482	ATPase, Na+/K+ transporting, beta 2 polypeptide
ATP1B3	483	ATPase, Na+/K+ transporting, beta 3 polypeptide
ATP1B4	23439	ATPase, (Na+)/K+ transporting, beta 4 polypeptide
ATP2A1	487	ATPase, Ca++ transporting, cardiac muscle, fast twitch 1
ATP2A2	488	ATPase, Ca++ transporting, cardiac muscle, slow twitch 2
ATP2A3	489	ATPase, Ca++ transporting, ubiquitous
ATP2B1	490	ATPase, Ca++ transporting, plasma membrane 1
ATP2B2	491	ATPase, Ca++ transporting, plasma membrane 2
ATP2B3	492	ATPase, Ca++ transporting, plasma membrane 3
ATP2B4	493	ATPase, Ca++ transporting, plasma membrane 4
ATP2C1	27032	ATPase, Ca++ transporting, type 2C, member 1
ATP2C2	9914	ATPase, Ca++ transporting, type 2C, member 2
ATP4A	495	ATPase, H+/K+ exchanging, alpha polypeptide
ATP4B	496	ATPase, H+/K+ exchanging, beta polypeptide
ATP5A1	498	ATP synthase, H+ transporting, mitochondrial F1 complex, alpha subunit 1, cardiac muscle
ATP5B	506	ATP synthase, H+ transporting, mitochondrial F1 complex, beta polypeptide
ATP5BL1	507	ATP synthase, H+ transporting, mitochondrial F1 complex, beta polypeptide-like 1
ATP5BL2	508	ATP synthase, H+ transporting, mitochondrial F1 complex, beta polypeptide-like 2
ATP5C1	509	ATP synthase, H+ transporting, mitochondrial F1 complex, gamma polypeptide 1
ATP5C2
ATP5D	513	ATP synthase, H+ transporting, mitochondrial F1 complex, delta subunit
ATP5E	514	ATP synthase, H+ transporting, mitochondrial F1 complex, epsilon subunit
ATP5F1	515	ATP synthase, H+ transporting, mitochondrial F0 complex, subunit B1
ATP5G1	516	ATP synthase, H+ transporting, mitochondrial F0 complex, subunit C1 (subunit 9)
ATP5G2	517	ATP synthase, H+ transporting, mitochondrial F0 complex, subunit C2 (subunit 9)
ATP5G3	518	ATP synthase, H+ transporting, mitochondrial F0 complex, subunit C3 (subunit 9)
ATP5H	10476	ATP synthase, H+ transporting, mitochondrial F0 complex, subunit d
ATP5I	521	ATP synthase, H+ transporting, mitochondrial F0 complex, subunit E
ATP5J	522	ATP synthase, H+ transporting, mitochondrial F0 complex, subunit F6
ATP5J2	9551	ATP synthase, H+ transporting, mitochondrial F0 complex, subunit F2
ATP5L	10632	ATP synthase, H+ transporting, mitochondrial F0 complex, subunit G
ATP5L2	267020	ATP synthase, H+ transporting, mitochondrial F0 complex, subunit G2
ATP5O	539	ATP synthase, H+ transporting, mitochondrial F1 complex, O subunit
ATP6	4508	ATP synthase F0 subunit 6
ATP6AP1	537	ATPase, H+ transporting, lysosomal accessory protein 1
ATP6V0A1	535	ATPase, H+ transporting, lysosomal V0 subunit a1
ATP6V0A2	23545	ATPase, H+ transporting, lysosomal V0 subunit a2
ATP6V0A4	50617	ATPase, H+ transporting, lysosomal V0 subunit a4
ATP6V0B	533	ATPase, H+ transporting, lysosomal 21kDa, V0 subunit b
ATP6V0C	527	ATPase, H+ transporting, lysosomal 16kDa, V0 subunit c
ATP6V0D1	9114	ATPase, H+ transporting, lysosomal 38kDa, V0 subunit d1
ATP6V0D2	245972	ATPase, H+ transporting, lysosomal 38kDa, V0 subunit d2
ATP6V0E1	8992	ATPase, H+ transporting, lysosomal 9kDa, V0 subunit e1
ATP6V0E2	155066	ATPase, H+ transporting V0 subunit e2
ATP6V1A	523	ATPase, H+ transporting, lysosomal 70kDa, V1 subunit A
ATP6V1B1	525	ATPase, H+ transporting, lysosomal 56/58kDa, V1 subunit B1
ATP6V1B2	526	ATPase, H+ transporting, lysosomal 56/58kDa, V1 subunit B2
ATP6V1C1	528	ATPase, H+ transporting, lysosomal 42kDa, V1 subunit C1
ATP6V1C2	245973	ATPase, H+ transporting, lysosomal 42kDa, V1 subunit C2
ATP6V1D	51382	ATPase, H+ transporting, lysosomal 34kDa, V1 subunit D
ATP6V1E1	529	ATPase, H+ transporting, lysosomal 31kDa, V1 subunit E1
ATP6V1E2	90423	ATPase, H+ transporting, lysosomal 31kDa, V1 subunit E2
ATP6V1F	9296	ATPase, H+ transporting, lysosomal 14kDa, V1 subunit F
ATP6V1G1	9550	ATPase, H+ transporting, lysosomal 13kDa, V1 subunit G1
ATP6V1G2	534	ATPase, H+ transporting, lysosomal 13kDa, V1 subunit G2
ATP6V1G3	127124	ATPase, H+ transporting, lysosomal 13kDa, V1 subunit G3
ATP6V1H	51606	ATPase, H+ transporting, lysosomal 50/57kDa, V1 subunit H
ATP8	4509	ATP synthase F0 subunit 8
ATP8A1	10396	ATPase, aminophospholipid transporter (APLT), class I, type 8A, member 1
ATP8A2	51761	ATPase, aminophospholipid transporter-like, class I, type 8A, member 2
ATP8B1	5205	ATPase, class I, type 8B, member 1
ATP8B2	57198	ATPase, class I, type 8B, member 2
ATP8B3	148229	ATPase, class I, type 8B, member 3
ATP8B4	79895	ATPase, class I, type 8B, member 4
ATP9A	10079	ATPase, class II, type 9A
ATP9B	374868	ATPase, class II, type 9B
B3GNT2	10678	UDP-GlcNAc:betaGal beta-1,3-N-acetylglucosaminyltransferase 2
B3GNT6	192134	UDP-GlcNAc:betaGal beta-1,3-N-acetylglucosaminyltransferase 6 (core 3 synthase)
B4GALT1	2683	UDP-Gal:betaGlcNAc beta 1,4- galactosyltransferase, polypeptide 1
B4GALT2	8704	UDP-Gal:betaGlcNAc beta 1,4- galactosyltransferase, polypeptide 2
B4GALT3	8703	UDP-Gal:betaGlcNAc beta 1,4- galactosyltransferase, polypeptide 3
B4GALT4	8702	UDP-Gal:betaGlcNAc beta 1,4- galactosyltransferase, polypeptide 4
B4GALT5	9334	UDP-Gal:betaGlcNAc beta 1,4- galactosyltransferase, polypeptide 5
B4GALT7	11285	xylosylprotein beta 1,4-galactosyltransferase, polypeptide 7 (galactosyltransferase I)
CAD	790	carbamoyl-phosphate synthetase 2, aspartate transcarbamylase, and dihydroorotase
CANT1	124583	calcium activated nucleotidase 1
CDA	978	cytidine deaminase
CDY1	9085	chromodomain protein, Y-linked, 1
CDY1B	253175	chromodomain protein, Y-linked, 1B
CDY2A	9426	chromodomain protein, Y-linked, 2A
CDY2B	203611	chromodomain protein, Y-linked, 2B
CHKA	1119	choline kinase alpha
CHKB	1120	choline kinase beta
CKB	1152	creatine kinase, brain
CKBE	1156	creatine kinase, ectopic expression
CKM	1158	creatine kinase, muscle
CKMT1A	548596	creatine kinase, mitochondrial 1A
CKMT1B	1159	creatine kinase, mitochondrial 1B
CKMT2	1160	creatine kinase, mitochondrial 2 (sarcomeric)
CLC	1178	Charcot-Leyden crystal protein
CLCF1	23529	cardiotrophin-like cytokine factor 1
CLYBL	171425	citrate lyase beta like
CMAS	55907	cytidine monophosphate N-acetylneuraminic acid synthetase
CMPK1	51727	cytidine monophosphate (UMP-CMP) kinase 1, cytosolic
COASY	80347	Coenzyme A synthase
CPT1A	1374	carnitine palmitoyltransferase 1A (liver)
CPT1B	1375	carnitine palmitoyltransferase 1B (muscle)
CPT1C	126129	carnitine palmitoyltransferase 1C
CPT2	1376	carnitine palmitoyltransferase 2
CRAT	1384	carnitine acetyltransferase
CREBBP	1387	CREB binding protein
CROT	54677	carnitine O-octanoyltransferase
CS	1431	citrate synthase
CYB5R1	51706	cytochrome b5 reductase 1
CYB5R3	1727	cytochrome b5 reductase 3
CYP19A1	1588	cytochrome P450, family 19, subfamily A, polypeptide 1
CYP1A1	1543	cytochrome P450, family 1, subfamily A, polypeptide 1
CYP1A2	1544	cytochrome P450, family 1, subfamily A, polypeptide 2
CYP1B1	1545	cytochrome P450, family 1, subfamily B, polypeptide 1
CYP2A13	1553	cytochrome P450, family 2, subfamily A, polypeptide 13
CYP2A6	1548	cytochrome P450, family 2, subfamily A, polypeptide 6
CYP2A7	1549	cytochrome P450, family 2, subfamily A, polypeptide 7
CYP2B6	1555	cytochrome P450, family 2, subfamily B, polypeptide 6
CYP2C18	1562	cytochrome P450, family 2, subfamily C, polypeptide 18
CYP2C8	1558	cytochrome P450, family 2, subfamily C, polypeptide 8
CYP2C9	1559	cytochrome P450, family 2, subfamily C, polypeptide 9
CYP2D6	1565	cytochrome P450, family 2, subfamily D, polypeptide 6
CYP2E1	1571	cytochrome P450, family 2, subfamily E, polypeptide 1
CYP2F1	1572	cytochrome P450, family 2, subfamily F, polypeptide 1
CYP2J2	1573	cytochrome P450, family 2, subfamily J, polypeptide 2
CYP2S1	29785	cytochrome P450, family 2, subfamily S, polypeptide 1
CYP3A4	1576	cytochrome P450, family 3, subfamily A, polypeptide 4
CYP3A43	64816	cytochrome P450, family 3, subfamily A, polypeptide 43
CYP3A5	1577	cytochrome P450, family 3, subfamily A, polypeptide 5
CYP3A7	1551	cytochrome P450, family 3, subfamily A, polypeptide 7
CYP4A11	1579	cytochrome P450, family 4, subfamily A, polypeptide 11
CYP4A22	284541	cytochrome P450, family 4, subfamily A, polypeptide 22
CYP4B1	1580	cytochrome P450, family 4, subfamily B, polypeptide 1
CYP4F11	57834	cytochrome P450, family 4, subfamily F, polypeptide 11
CYP4F12	66002	cytochrome P450, family 4, subfamily F, polypeptide 12
CYP4F8	11283	cytochrome P450, family 4, subfamily F, polypeptide 8
CYP4X1	260293	cytochrome P450, family 4, subfamily X, polypeptide 1
CYP4Z1	199974	cytochrome P450, family 4, subfamily Z, polypeptide 1
DCXR	51181	dicarbonyl/L-xylulose reductase
DDAH1	23576	dimethylarginine dimethylaminohydrolase 1
DDAH2	23564	dimethylarginine dimethylaminohydrolase 2
DHODH	1723	dihydroorotate dehydrogenase
DLD	1738	dihydrolipoamide dehydrogenase
DLST	1743	dihydrolipoamide S-succinyltransferase (E2 component of 2-oxo-glutarate complex)
DPYD	1806	dihydropyrimidine dehydrogenase
DYNC2H1	79659	dynein, cytoplasmic 2, heavy chain 1
ENPP1	5167	ectonucleotide pyrophosphatase/phosphodiesterase 1
ENPP2	5168	ectonucleotide pyrophosphatase/phosphodiesterase 2
ENPP3	5169	ectonucleotide pyrophosphatase/phosphodiesterase 3
ENPP7	339221	ectonucleotide pyrophosphatase/phosphodiesterase 7
ENTPD1	953	ectonucleoside triphosphate diphosphohydrolase 1
ENTPD2	954	ectonucleoside triphosphate diphosphohydrolase 2
ENTPD3	956	ectonucleoside triphosphate diphosphohydrolase 3
ENTPD8	377841	ectonucleoside triphosphate diphosphohydrolase 8
EP300	2033	E1A binding protein p300
ETNK1	55500	ethanolamine kinase 1
ETNK2	55224	ethanolamine kinase 2
FAAH2	158584	fatty acid amide hydrolase 2
FAH	2184	fumarylacetoacetate hydrolase (fumarylacetoacetase)
FAM65A	79567	family with sequence similarity 65, member A
FASN	2194	fatty acid synthase
FH	2271	fumarate hydratase
FLAD1	80308	FAD1 flavin adenine dinucleotide synthetase homolog (S. cerevisiae)
FPGS	2356	folylpolyglutamate synthase
FUT9	10690	fucosyltransferase 9 (alpha (1,3) fucosyltransferase)
GAA	2548	glucosidase, alpha; acid
GAD1	2571	glutamate decarboxylase 1 (brain, 67kDa)
GAD2	2572	glutamate decarboxylase 2 (pancreatic islets and brain, 65kDa)
GALNT7	51809	UDP-N-acetyl-alpha-D-galactosamine:polypeptide N-acetylgalactosaminyltransferase 7 (GalNAc-T7)
GAMT	2593	guanidinoacetate N-methyltransferase
GANAB	23193	glucosidase, alpha; neutral AB
GANC	2595	glucosidase, alpha; neutral C
GATM	2628	glycine amidinotransferase (L-arginine:glycine amidinotransferase)
GBGT1	26301	globoside alpha-1,3-N-acetylgalactosaminyltransferase 1
GCLC	2729	glutamate-cysteine ligase, catalytic subunit
GCLM	2730	glutamate-cysteine ligase, modifier subunit
GCN5L2	2648	K(lysine) acetyltransferase 2A
GCTG
GK	2710	glycerol kinase
GK2	2712	glycerol kinase 2
GK3P	2713	glycerol kinase 3 pseudogene
GK5	256356	glycerol kinase 5 (putative)
GPAM	57678	glycerol-3-phosphate acyltransferase, mitochondrial
GPD1	2819	glycerol-3-phosphate dehydrogenase 1 (soluble)
GPD2	2820	glycerol-3-phosphate dehydrogenase 2 (mitochondrial)
GPX1	2876	glutathione peroxidase 1
GPX2	2877	glutathione peroxidase 2 (gastrointestinal)
GPX3	2878	glutathione peroxidase 3 (plasma)
GPX4	2879	glutathione peroxidase 4 (phospholipid hydroperoxidase)
GPX5	2880	glutathione peroxidase 5 (epididymal androgen-related protein)
GPX6	257202	glutathione peroxidase 6 (olfactory)
GPX7	2882	glutathione peroxidase 7
GSR	2936	glutathione reductase
GSS	2937	glutathione synthetase
GTF3C4	9329	general transcription factor IIIC, polypeptide 4, 90kDa
HADHB	3032	hydroxyacyl-Coenzyme A dehydrogenase/3-ketoacyl-Coenzyme A thiolase/enoyl-Coenzyme A hydratase (trifunctional protein), beta subunit
HAT1	8520	histone acetyltransferase 1
HK1	3098	hexokinase 1
HK2	3099	hexokinase 2
HK3	3101	hexokinase 3 (white cell)
HPGD	3248	hydroxyprostaglandin dehydrogenase 15-(NAD)
HPRT1	3251	hypoxanthine phosphoribosyltransferase 1
HSD3B1	3283	hydroxy-delta-5-steroid dehydrogenase, 3 beta- and steroid delta-isomerase 1
HSD3B2	3284	hydroxy-delta-5-steroid dehydrogenase, 3 beta- and steroid delta-isomerase 2
HTATIP	10524	K(lysine) acetyltransferase 5
ITPKA	3706	inositol 1,4,5-trisphosphate 3-kinase A
ITPKB	3707	inositol 1,4,5-trisphosphate 3-kinase B
KATNA1	11104	katanin p60 (ATPase-containing) subunit A 1
KATNAL1	84056	katanin p60 subunit A-like 1
KHK	3795	ketohexokinase (fructokinase)
KIF3B	9371	kinesin family member 3B
LDHA	3939	lactate dehydrogenase A
LDHAL6A	160287	lactate dehydrogenase A-like 6A
LDHAL6B	92483	lactate dehydrogenase A-like 6B
LDHB	3945	lactate dehydrogenase B
LDHC	3948	lactate dehydrogenase C
LGALS13	29124	lectin, galactoside-binding, soluble, 13
LOC100137047-PLA2G4B	8681	JMJD7-PLA2G4B readthrough
LYPLA1	10434	lysophospholipase I
LYPLA2	11313	lysophospholipase II
LYPLA3	23659	phospholipase A2, group XV
MGAM	8972	maltase-glucoamylase (alpha-glucosidase)
MGEA5	10724	meningioma expressed antigen 5 (hyaluronidase)
MTAP	4507	methylthioadenosine phosphorylase
MYST1	84148	MYST histone acetyltransferase 1
MYST2	11143	MYST histone acetyltransferase 2
MYST3	7994	MYST histone acetyltransferase (monocytic leukemia) 3
MYST4	23522	MYST histone acetyltransferase (monocytic leukemia) 4
NANS	54187	N-acetylneuraminic acid synthase
NAT1	9	N-acetyltransferase 1 (arylamine N-acetyltransferase)
NAT2	10	N-acetyltransferase 2 (arylamine N-acetyltransferase)
NCOA1	8648	nuclear receptor coactivator 1
NCOA3	8202	nuclear receptor coactivator 3
NME1	4830	non-metastatic cells 1, protein (NM23A) expressed in
NME2	4831	non-metastatic cells 2, protein (NM23B) expressed in
NME2P1	283458	non-metastatic cells 2, protein (NM23B) expressed in, pseudogene 1
NME3	4832	non-metastatic cells 3, protein expressed in
NME4	4833	non-metastatic cells 4, protein expressed in
NME5	8382	non-metastatic cells 5, protein expressed in (nucleoside-diphosphate kinase)
NME6	10201	non-metastatic cells 6, protein expressed in (nucleoside-diphosphate kinase)
NME7	29922	non-metastatic cells 7, protein expressed in (nucleoside-diphosphate kinase)
NMT1	4836	N-myristoyltransferase 1
NMT2	9397	N-myristoyltransferase 2
NOS1	4842	nitric oxide synthase 1 (neuronal)
NOS2A	4843	nitric oxide synthase 2, inducible
NOS3	4846	nitric oxide synthase 3 (endothelial cell)
NP	4860	purine nucleoside phosphorylase
NPL	80896	N-acetylneuraminate pyruvate lyase (dihydrodipicolinate synthase)
NSF	4905	N-ethylmaleimide-sensitive factor
NT3	4877	3'-nucleotidase
NT5C	30833	5', 3'-nucleotidase, cytosolic
NT5C1A	84618	5'-nucleotidase, cytosolic IA
NT5C1B	93034	5'-nucleotidase, cytosolic IB
NT5C2	22978	5'-nucleotidase, cytosolic II
NT5C3	51251	5'-nucleotidase, cytosolic III
NT5E	4907	5'-nucleotidase, ecto (CD73)
NT5M	56953	5',3'-nucleotidase, mitochondrial
NUDT2	318	nudix (nucleoside diphosphate linked moiety X)-type motif 2
NUDT5	11164	nudix (nucleoside diphosphate linked moiety X)-type motif 5
NUDT9	53343	nudix (nucleoside diphosphate linked moiety X)-type motif 9
OAT	4942	ornithine aminotransferase (gyrate atrophy)
ODC1	4953	ornithine decarboxylase 1
OGDH	4967	oxoglutarate (alpha-ketoglutarate) dehydrogenase (lipoamide)
OGDHL	55753	oxoglutarate dehydrogenase-like
OLAH	55301	oleoyl-ACP hydrolase
OTC	5009	ornithine carbamoyltransferase
PANK1	53354	pantothenate kinase 1
PANK2	80025	pantothenate kinase 2
PANK3	79646	pantothenate kinase 3
PANK4	55229	pantothenate kinase 4
PAOX	196743	polyamine oxidase (exo-N4-amino)
PAPD1	55149	mitochondrial poly(A) polymerase
PAPOLA	10914	poly(A) polymerase alpha
PAPOLB	56903	poly(A) polymerase beta (testis specific)
PAPOLG	64895	poly(A) polymerase gamma
PAPSS2	9060	3'-phosphoadenosine 5'-phosphosulfate synthase 2
PCAF	8850	K(lysine) acetyltransferase 2B
PCYT1A	5130	phosphate cytidylyltransferase 1, choline, alpha
PCYT1B	9468	phosphate cytidylyltransferase 1, choline, beta
PCYT2	5833	phosphate cytidylyltransferase 2, ethanolamine
PDXK	8566	pyridoxal (pyridoxine, vitamin B6) kinase
PFKFB1	5207	6-phosphofructo-2-kinase/fructose-2,6-biphosphatase 1
PFKFB2	5208	6-phosphofructo-2-kinase/fructose-2,6-biphosphatase 2
PGD	5226	phosphogluconate dehydrogenase
PGM1	5236	phosphoglucomutase 1
PGM2	55276	phosphoglucomutase 2
PGM2L1	283209	phosphoglucomutase 2-like 1
PGM3	5238	phosphoglucomutase 3
PHOSPHO1	162466	phosphatase, orphan 1
PIPOX	51268	pipecolic acid oxidase
PKLR	5313	pyruvate kinase, liver and RBC
PKM2	5315	pyruvate kinase, muscle
PLA2G10	8399	phospholipase A2, group X
PLA2G12A	81579	phospholipase A2, group XIIA
PLA2G12B	84647	phospholipase A2, group XIIB
PLA2G1B	5319	phospholipase A2, group IB (pancreas)
PLA2G2A	5320	phospholipase A2, group IIA (platelets, synovial fluid)
PLA2G2D	26279	phospholipase A2, group IID
PLA2G2E	30814	phospholipase A2, group IIE
PLA2G2F	64600	phospholipase A2, group IIF
PLA2G3	50487	phospholipase A2, group III
PLA2G4A	5321	phospholipase A2, group IVA (cytosolic, calcium-dependent)
PLA2G4C	8605	phospholipase A2, group IVC (cytosolic, calcium-independent)
PLA2G4D	283748	phospholipase A2, group IVD (cytosolic)
PLA2G4E	123745	phospholipase A2, group IVE
PLA2G4F	255189	phospholipase A2, group IVF
PLA2G5	5322	phospholipase A2, group V
PLA2G6	8398	phospholipase A2, group VI (cytosolic, calcium-independent)
PNPO	55163	pyridoxamine 5'-phosphate oxidase
POLR1A	25885	polymerase (RNA) I polypeptide A, 194kDa
POLR1B	84172	polymerase (RNA) I polypeptide B, 128kDa
POLR1C	9533	polymerase (RNA) I polypeptide C, 30kDa
POLR1D	51082	polymerase (RNA) I polypeptide D, 16kDa
POLR1E	64425	polymerase (RNA) I polypeptide E, 53kDa
POLR2A	5430	polymerase (RNA) II (DNA directed) polypeptide A, 220kDa
POLR2B	5431	polymerase (RNA) II (DNA directed) polypeptide B, 140kDa
POLR2C	5432	polymerase (RNA) II (DNA directed) polypeptide C, 33kDa
POLR2D	5433	polymerase (RNA) II (DNA directed) polypeptide D
POLR2E	5434	polymerase (RNA) II (DNA directed) polypeptide E, 25kDa
POLR2F	5435	polymerase (RNA) II (DNA directed) polypeptide F
POLR2G	5436	polymerase (RNA) II (DNA directed) polypeptide G
POLR2H	5437	polymerase (RNA) II (DNA directed) polypeptide H
POLR2I	5438	polymerase (RNA) II (DNA directed) polypeptide I, 14.5kDa
POLR2J	5439	polymerase (RNA) II (DNA directed) polypeptide J, 13.3kDa
POLR2K	5440	polymerase (RNA) II (DNA directed) polypeptide K, 7.0kDa
POLR2L	5441	polymerase (RNA) II (DNA directed) polypeptide L, 7.6kDa
POLR3A	11128	polymerase (RNA) III (DNA directed) polypeptide A, 155kDa
POLR3B	55703	polymerase (RNA) III (DNA directed) polypeptide B
POLR3C	10623	polymerase (RNA) III (DNA directed) polypeptide C (62kD)
POLR3D	661	polymerase (RNA) III (DNA directed) polypeptide D, 44kDa
POLR3E	55718	polymerase (RNA) III (DNA directed) polypeptide E (80kD)
POLR3F	10621	polymerase (RNA) III (DNA directed) polypeptide F, 39 kDa
POLR3G	10622	polymerase (RNA) III (DNA directed) polypeptide G (32kD)
POLR3GL	84265	polymerase (RNA) III (DNA directed) polypeptide G (32kD)-like
POLR3H	171568	polymerase (RNA) III (DNA directed) polypeptide H (22.9kD)
POLR3K	51728	polymerase (RNA) III (DNA directed) polypeptide K, 12.3 kDa
POLRMT	5442	polymerase (RNA) mitochondrial (DNA directed)
PRPS1	5631	phosphoribosyl pyrophosphate synthetase 1
PRPS1L1	221823	phosphoribosyl pyrophosphate synthetase 1-like 1
PRPS2	5634	phosphoribosyl pyrophosphate synthetase 2
PTGS1	5742	prostaglandin-endoperoxide synthase 1 (prostaglandin G/H synthase and cyclooxygenase)
PTGS2	5743	prostaglandin-endoperoxide synthase 2 (prostaglandin G/H synthase and cyclooxygenase)
RARS	5917	arginyl-tRNA synthetase
RARS2	57038	arginyl-tRNA synthetase 2, mitochondrial
RBKS	64080	ribokinase
REG3A	5068	regenerating islet-derived 3 alpha
RPE	6120	ribulose-5-phosphate-3-epimerase
RPIA	22934	ribose 5-phosphate isomerase A
RPUSD4	84881	RNA pseudouridylate synthase domain containing 4
SAT1	6303	spermidine/spermine N1-acetyltransferase 1
SAT2	112483	spermidine/spermine N1-acetyltransferase family member 2
SDHA	6389	succinate dehydrogenase complex, subunit A, flavoprotein (Fp)
SDHB	6390	succinate dehydrogenase complex, subunit B, iron sulfur (Ip)
SDHC	6391	succinate dehydrogenase complex, subunit C, integral membrane protein, 15kDa
SDHD	6392	succinate dehydrogenase complex, subunit D, integral membrane protein
SGMS1	259230	sphingomyelin synthase 1
SGPL1	8879	sphingosine-1-phosphate lyase 1
SIAE	54414	sialic acid acetylesterase
SIRT6	51548	sirtuin (silent mating type information regulation 2 homolog) 6 (S. cerevisiae)
SLC27A2	11001	solute carrier family 27 (fatty acid transporter), member 2
SMPD1	6609	sphingomyelin phosphodiesterase 1, acid lysosomal
SMPD2	6610	sphingomyelin phosphodiesterase 2, neutral membrane (neutral sphingomyelinase)
SMPD3	55512	sphingomyelin phosphodiesterase 3, neutral membrane (neutral sphingomyelinase II)
SMPD4	55627	sphingomyelin phosphodiesterase 4, neutral membrane (neutral sphingomyelinase-3)
SMS	6611	spermine synthase
SORD	6652	sorbitol dehydrogenase
SPHK1	8877	sphingosine kinase 1
SPHK2	56848	sphingosine kinase 2
SRM	6723	spermidine synthase
ST3GAL1	6482	ST3 beta-galactoside alpha-2,3-sialyltransferase 1
ST3GAL2	6483	ST3 beta-galactoside alpha-2,3-sialyltransferase 2
ST3GAL4	6484	ST3 beta-galactoside alpha-2,3-sialyltransferase 4
ST6GALNAC2	10610	ST6 (alpha-N-acetyl-neuraminyl-2,3-beta-galactosyl-1,3)-N-acetylgalactosaminide alpha-2,6-sialyltransferase 2
ST6GALNAC4	27090	ST6 (alpha-N-acetyl-neuraminyl-2,3-beta-galactosyl-1,3)-N-acetylgalactosaminide alpha-2,6-sialyltransferase 4
STT3A	3703	STT3, subunit of the oligosaccharyltransferase complex, homolog A (S. cerevisiae)
STT3B	201595	STT3, subunit of the oligosaccharyltransferase complex, homolog B (S. cerevisiae)
TCIRG1	10312	T-cell, immune regulator 1, ATPase, H+ transporting, lysosomal V0 subunit A3
TKT	7086	transketolase
TKTL1	8277	transketolase-like 1
TKTL2	84076	transketolase-like 2
TRPM2	7226	transient receptor potential cation channel, subfamily M, member 2
TYMP	1890	thymidine phosphorylase
UCK1	83549	uridine-cytidine kinase 1
UCK2	7371	uridine-cytidine kinase 2
UMPS	7372	uridine monophosphate synthetase
UPP1	7378	uridine phosphorylase 1
UPP2	151531	uridine phosphorylase 2
ZNRD1	30834	zinc ribbon domain containing 1
